# Supplementary material for: Evaluating the Individualized Treatment of Traditional Chinese Medicine: A Pilot Study of N‐of‐1 Trials
Source: Hindawi journal article supplement (doi:10.1155/2014/148730), 2014-01-01
Supplement: f1 [file 148730.f1.pdf]

## Mean symptom score in each pair of single case trial for case 1

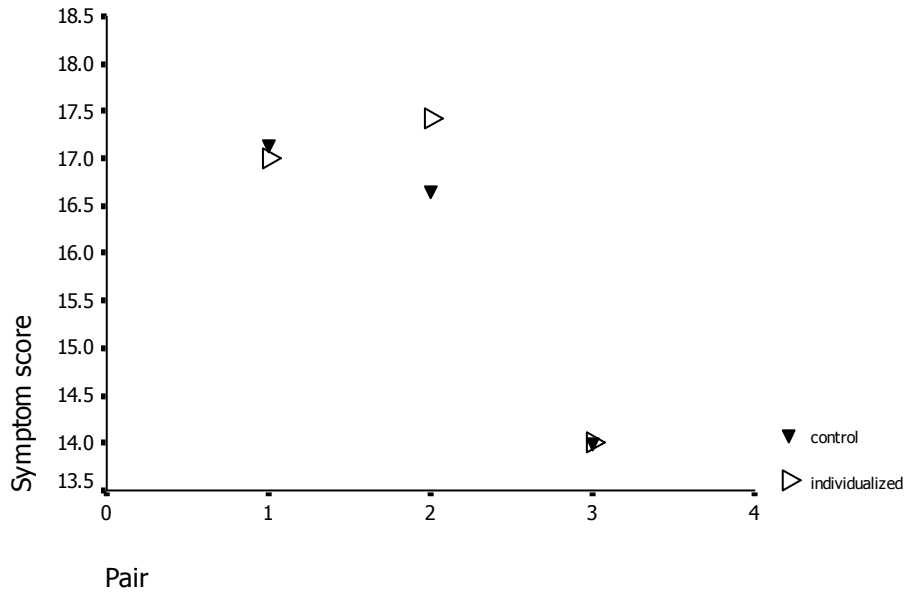

Figure 1: Mean symptom score in each pair of single case trial for case 1

After three pairs of treatment with the bronchiectasis stabilization decoction and the syndrome differentiation decoction, the patient (case1) felt that the treatment was quite successful. However, the comparison in overall symptom score showed no statistically significant differences (Figure 1).

## Mean symptom score in each pair of single case trial for case 2

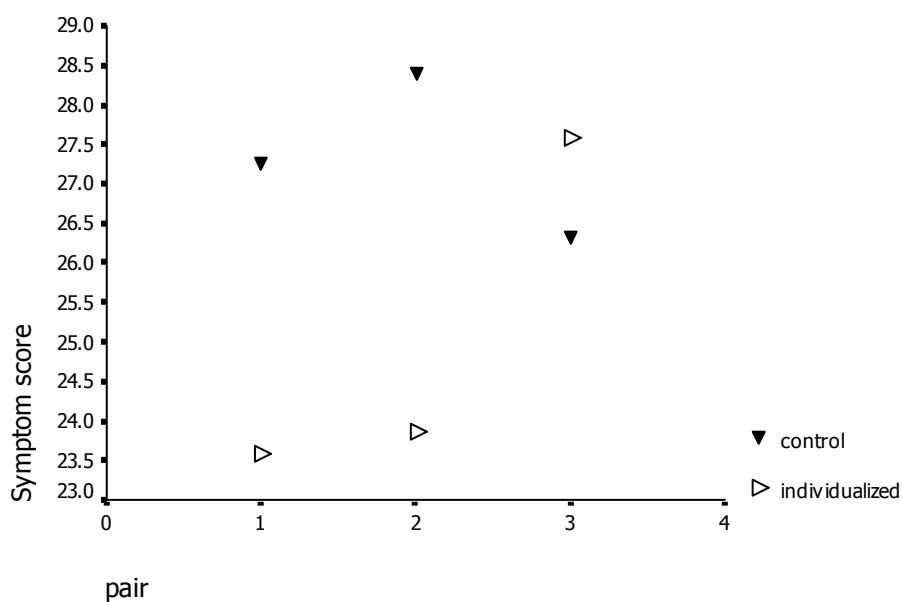

Figure 2: Mean symptom score in each pair of single case trial for case 2

Although difference in overall symptom score between the two decoctions was not statistically significant(Figure 2), the absolute difference of the mean symptom score between the two decoctions in two pairs of trial  $\geq 0.5$  points.

### Mean symptom score in each pair of single case trial for case 3

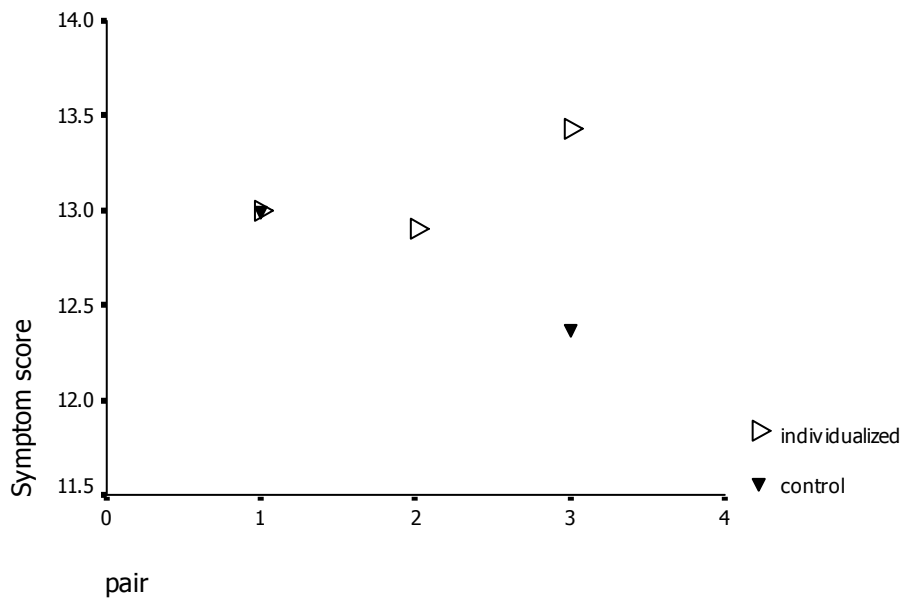

Figure 3: Mean symptom score in each pair of single case trial for case 3

The differences in overall symptom score of case 3 between the two decoctions were not statistically significant(Figure 3).

Table 1. Mean symptom score in the last week of each period and results of paired t test of all the 3 cases.

|                         | Case 1      | Case 2       | Case 3     |
|-------------------------|-------------|--------------|------------|
| Baseline                | 21          | 30           | 18         |
| Pair1 CP                | 17.14       | 27.29        | 13         |
| Pair1 IP                | 17          | 23.57        | 13         |
| Pair2 IP                | 17.43       | 23.86        | 12.9       |
| Pair2 CP                | 16.67       | 28.43        | *          |
| Pair3 CP                | 14          | 26.33        | 12.38      |
| Pair3 IP                | 14          | 27.57        | 13.43      |
| Mean Difference         | 0.21        | -2.25        | -0.525     |
| SD                      | 0.48        | 3.08         | 0.74       |
| t score                 | 0.74        | -1.30        | -1.0       |
| P-value                 | 0.54        | 0.32         | 0.5        |
| 95% Confidence Interval | -1.00, 1.41 | -10.15, 5.45 | -7.2, 6.15 |

CP: control decoction; IP: individualized decoction.

\* not available due to an acute exacerbation.

No statistically significant differences in overall symptom score between the two decoctions for all the 3 cases.
